# Supplementary material for: Designing inorganic–organic hybrid molecules based on carbazole/indole-appended cyclotriphosphazenes and the investigation of their photophysical properties
Source: Royal Society of Chemistry journal article supplement (doi:10.1039/d3nj01956j), 2023-01-01
Supplement: d3nj01956j1.pdf [file d3nj01956j1.pdf]

**Supplementary Informations**

**Designing inorganic-organic hybrid molecules based on  
carbazole/indole appended cyclotriphosphazenes and the  
investigation of their photophysical properties**

*Duygu Palabıyık, Ceylan Mutlu Balcı, Süreyya Oğuz Tümay, Serap Beşli\**

Department of Chemistry, Gebze Technical University, Gebze, Kocaeli, Turkey

Author for correspondence:

Dr. Serap Beşli, Department of Chemistry, Gebze Technical University, Gebze, Kocaeli  
41400, Turkey

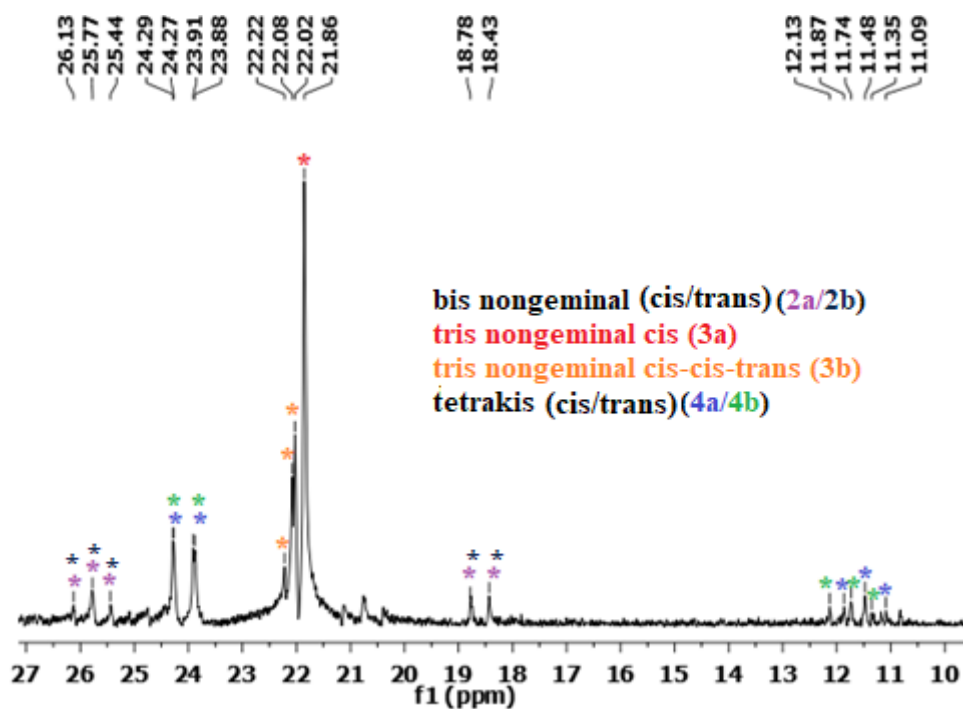

**Figure S1:**  $^{31}\text{P}$ -decoupled NMR spectrum of the mixture of **1** and **I** at 1:3 mole ratio in THF solution; the reaction mixture was filtered and the solvent removed prior to dissolving in  $\text{CDCl}_3$  solution.

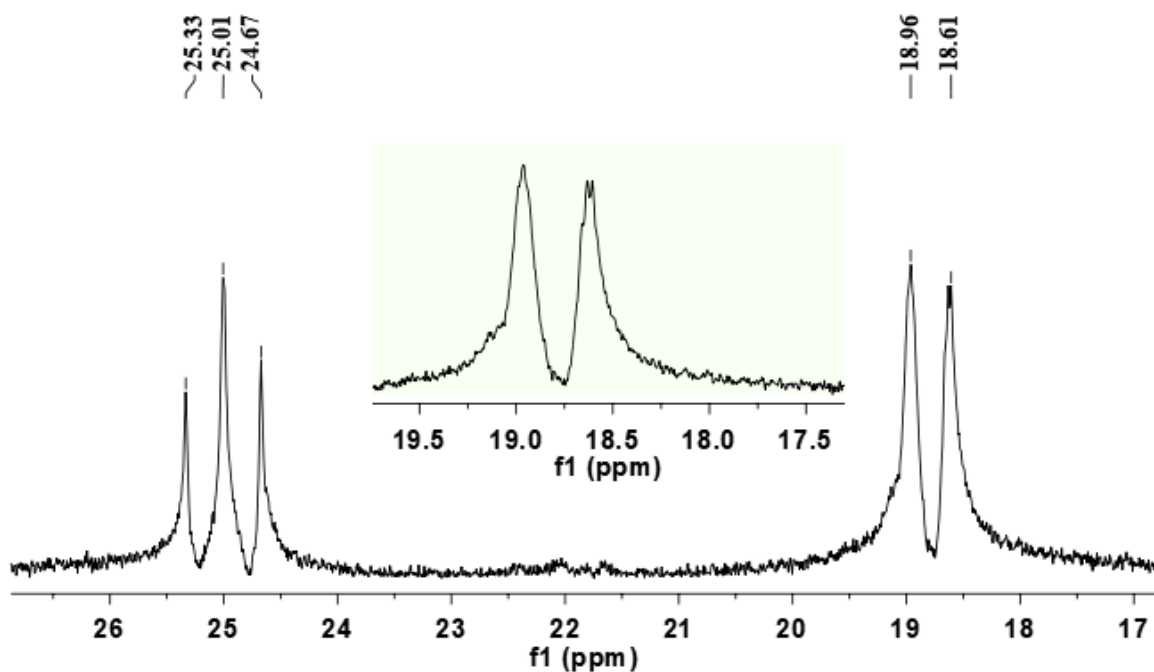

**Figure S2:**  $^{31}\text{P}$ -decoupled NMR spectrum of bis nongeminal (*cis/trans*) products (**2a/2b**).

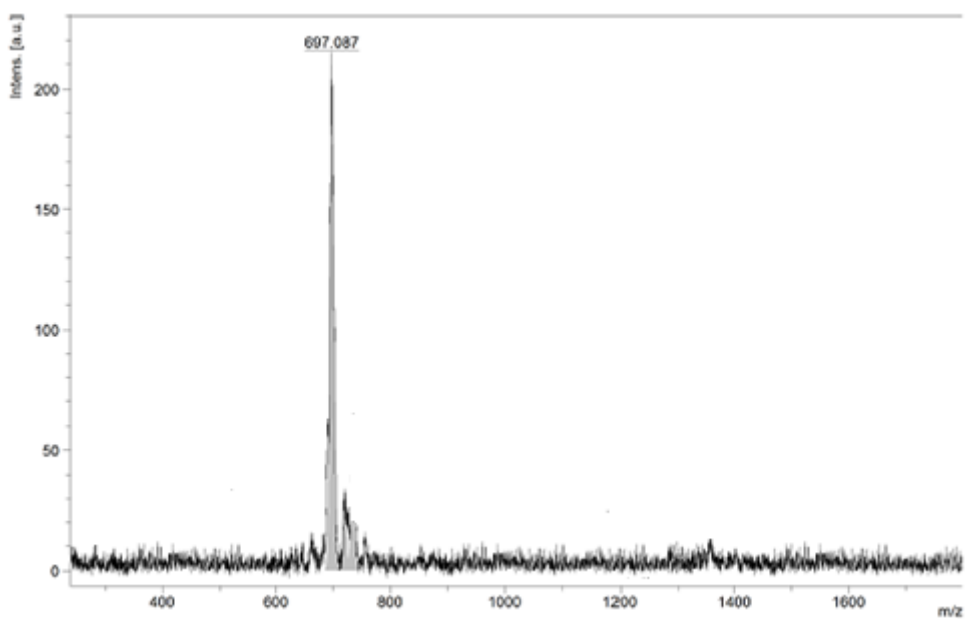

**Figure S3:** The mass spectrum of compounds **2a/2b**.

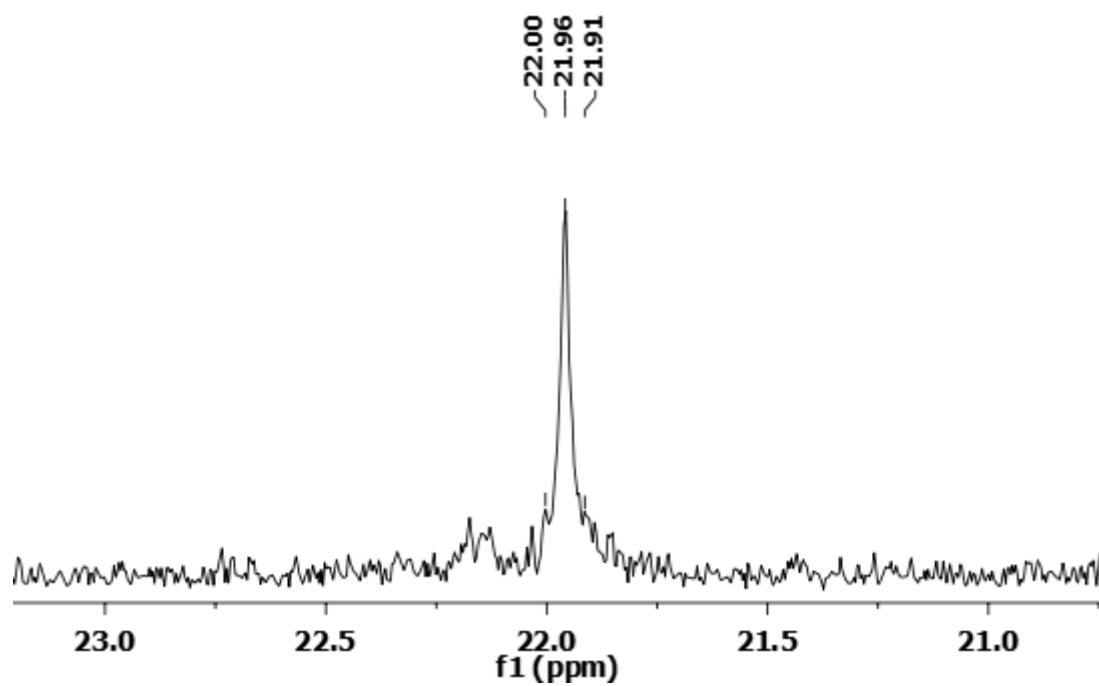

**Figure S4:**  $^{31}\text{P}$ -decoupled NMR spectrum of tris nongeminal products (**3a, b**).

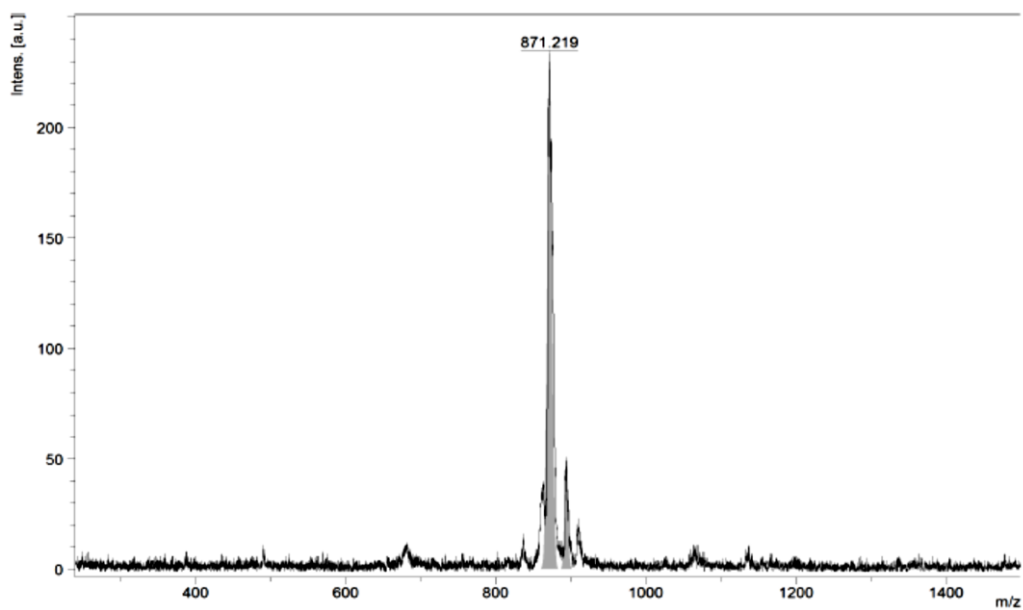

Figure S5: The mass spectrum of compounds 3a, b.

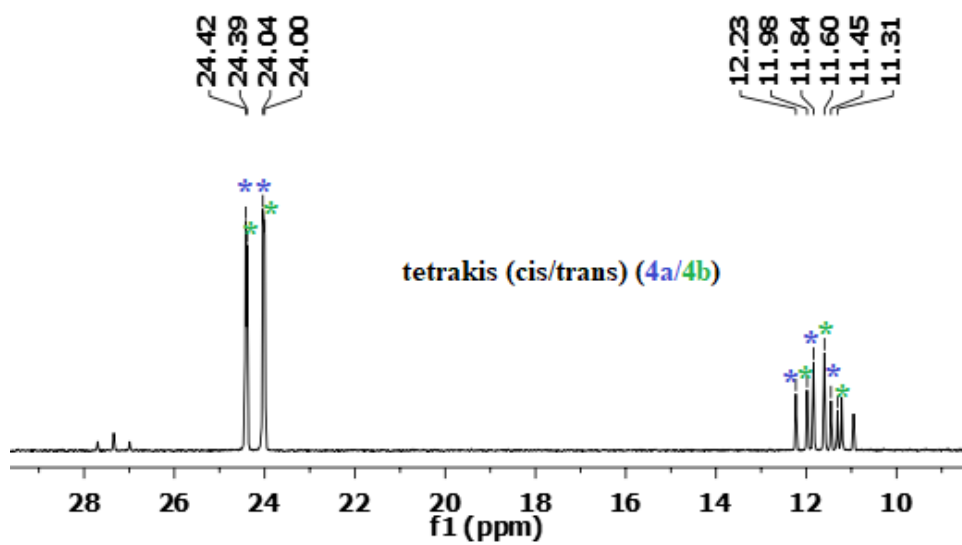

Figure S6:  $^{31}\text{P}$ -decoupled NMR spectrum of tetrakis (*cis/trans*) products (4a/4b).

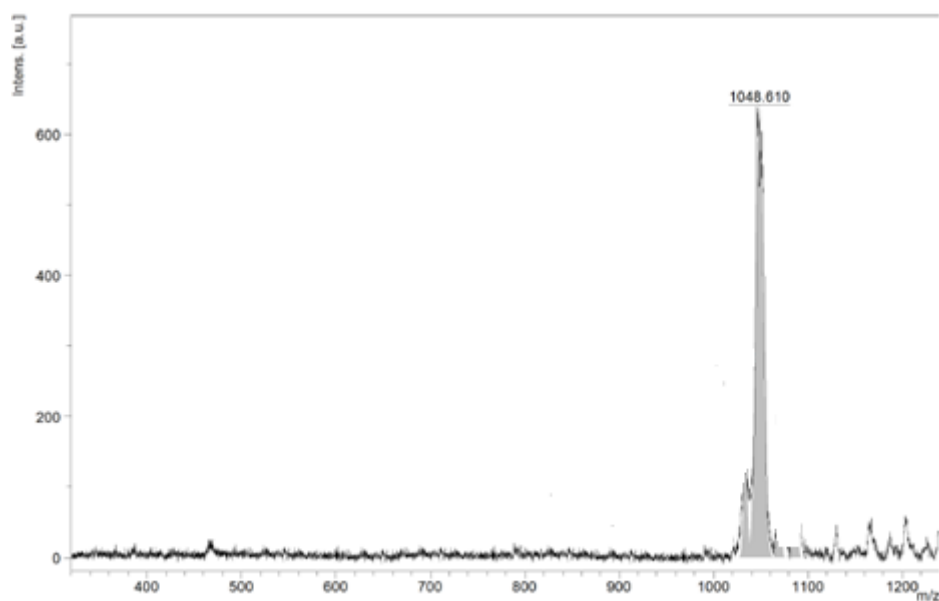

**Figure S7:** The mass spectrum of compounds **4a/4b**.

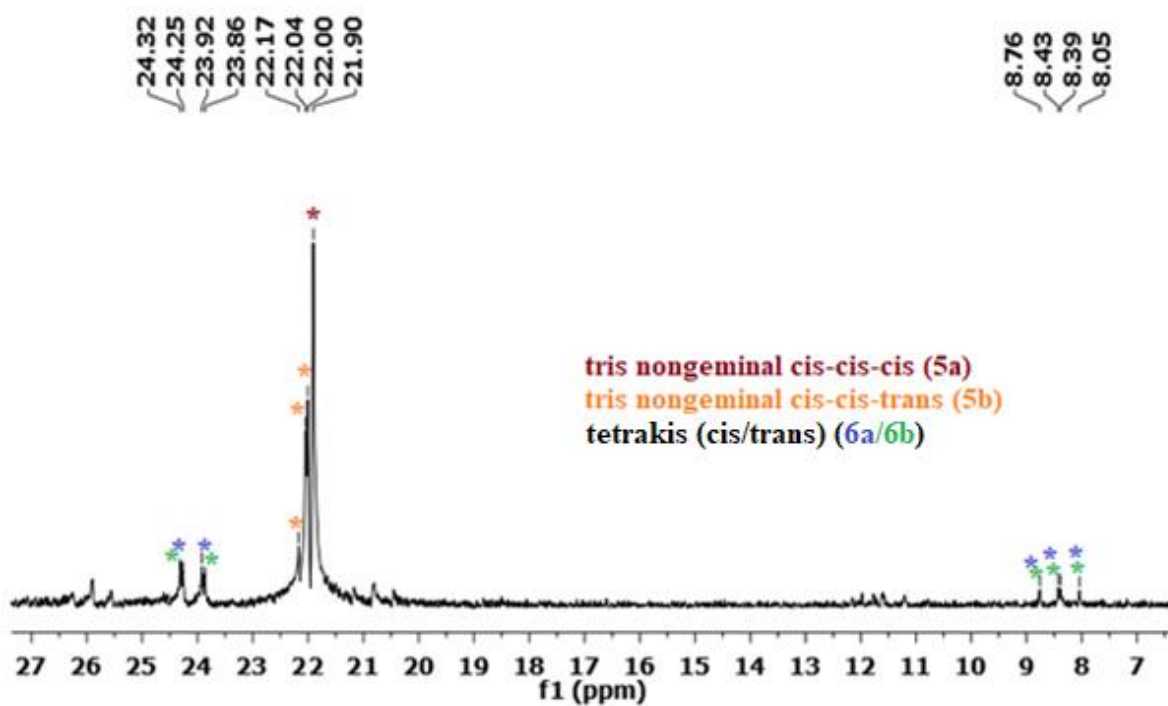

**Figure S8:** <sup>31</sup>P-decoupled NMR spectrum of the mixture of **1** and **II** at 1:3.1 mole ratio in THF solution; the reaction mixture was filtered and the solvent removed prior to dissolving in CDCl<sub>3</sub> solution.

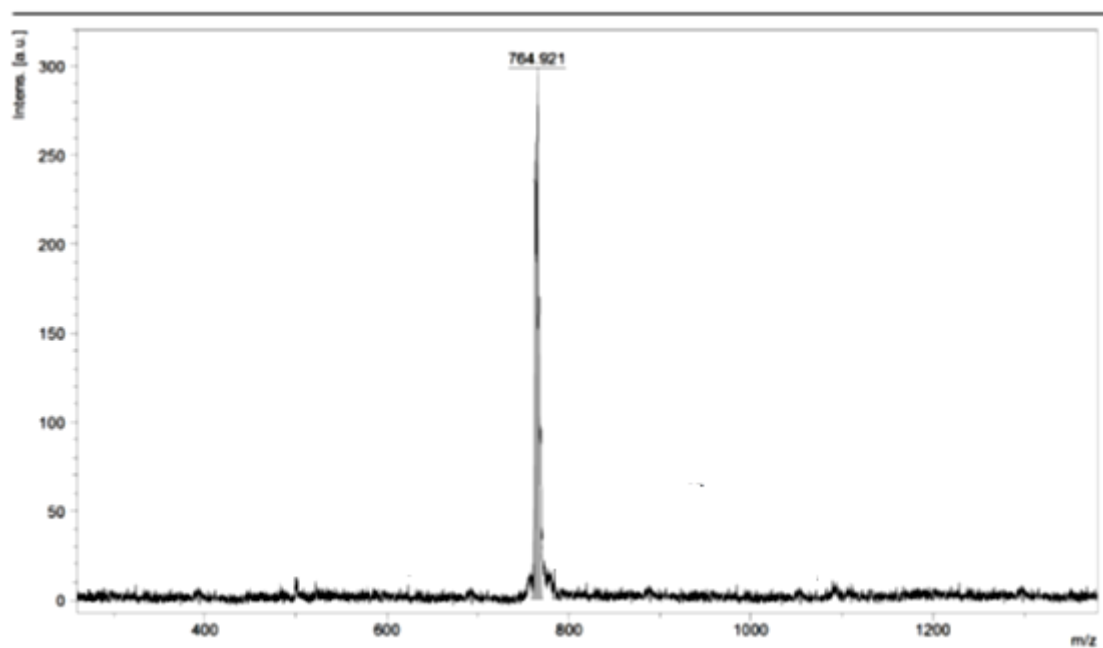

**Figure S9:** The mass spectrum of compounds **5a**, **b**.

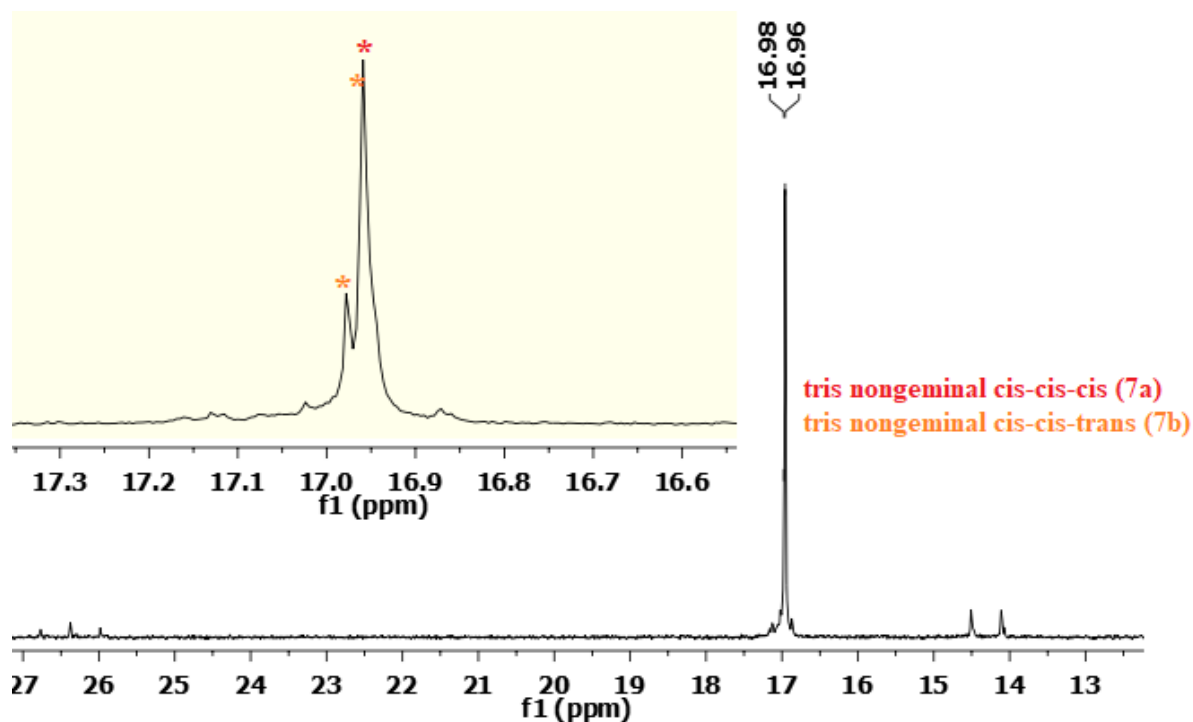

**Figure S10:** <sup>31</sup>P-decoupled NMR spectrum of the reaction mixture of **5a** and **5b** with **I** in THF solution; the reaction mixture was filtered and the solvent removed prior to dissolving in CDCl<sub>3</sub> solution.

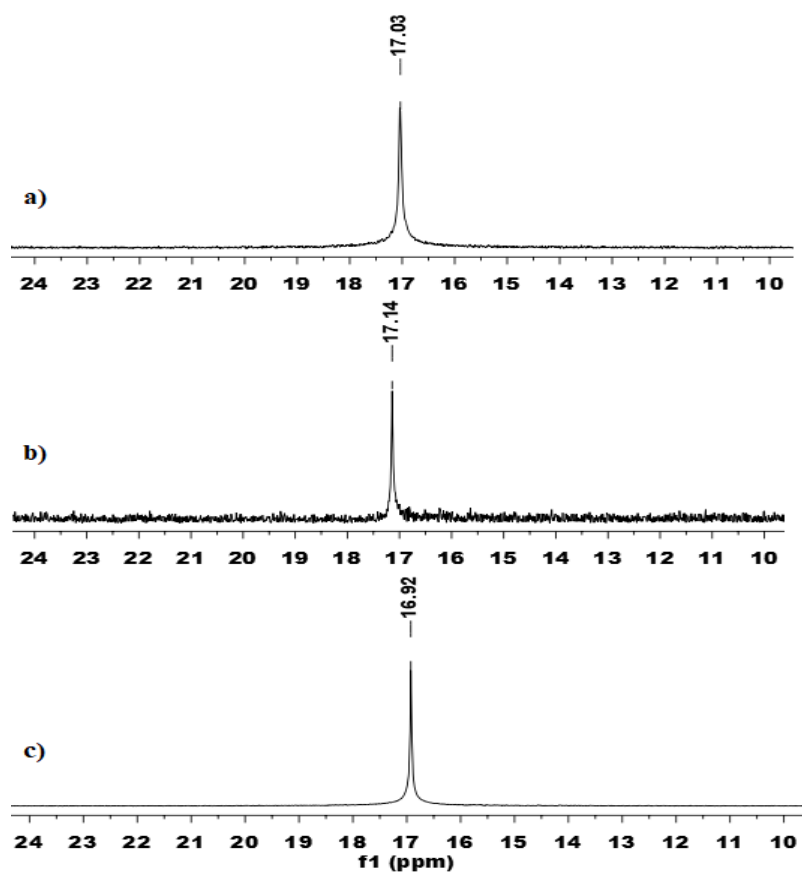

Figure S11:  $^{31}\text{P}$ -decoupled NMR spectra of compounds a) **7a** b) **8** c) **9**.

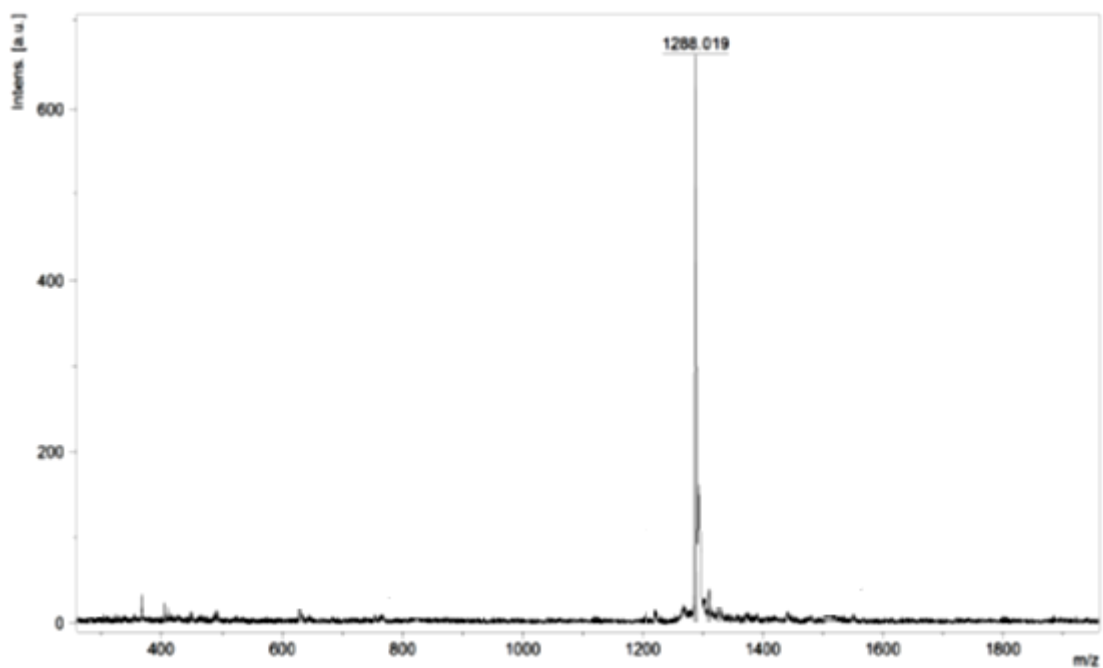

Figure S12: The mass spectrum of compound **7a**.

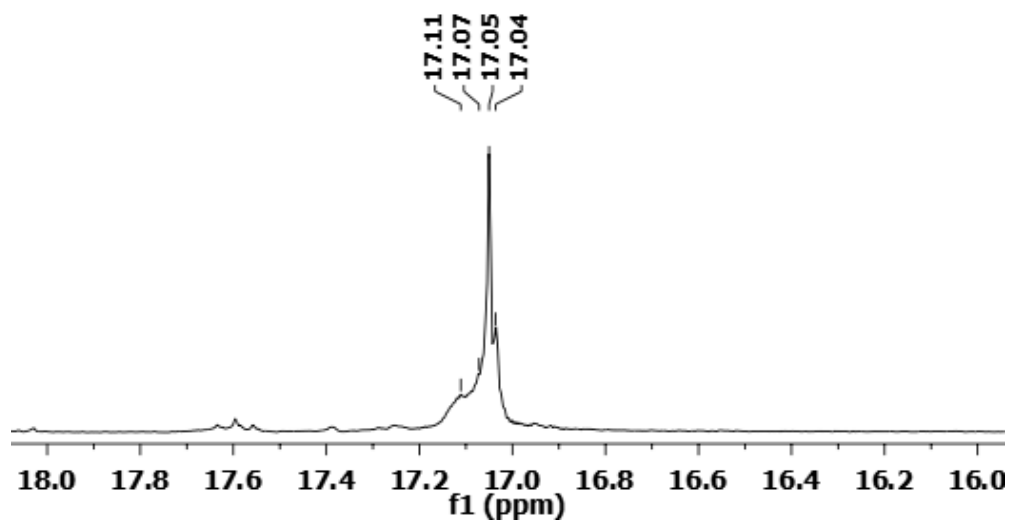

**Figure S13:**  $^{31}\text{P}$ -decoupled NMR spectrum of compounds **7a, b**.

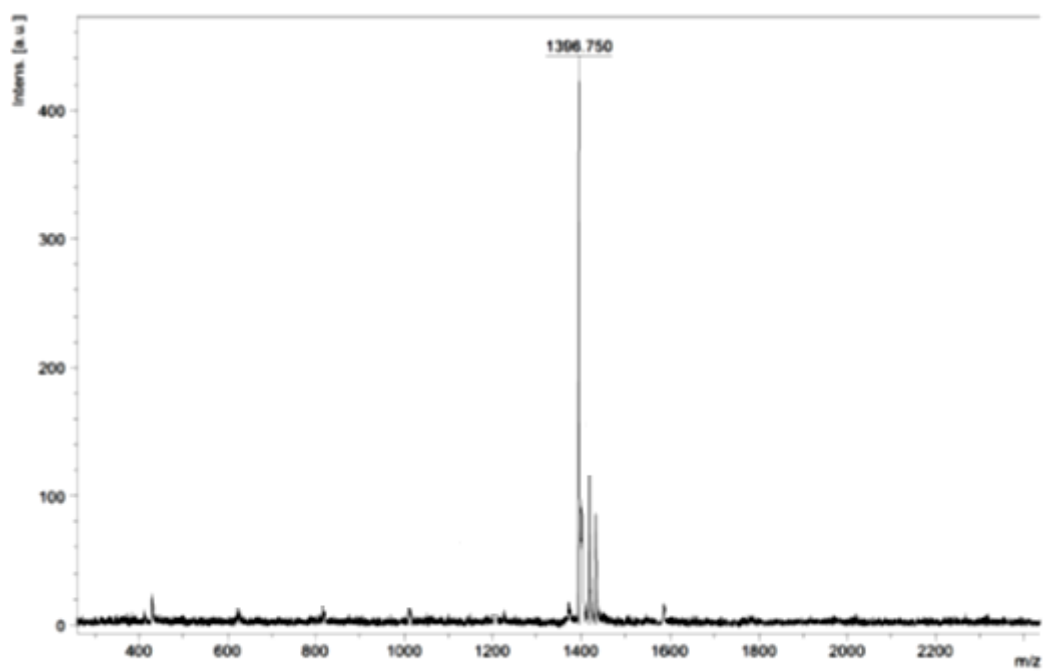

**Figure S14:** The mass spectrum of compound **8**.



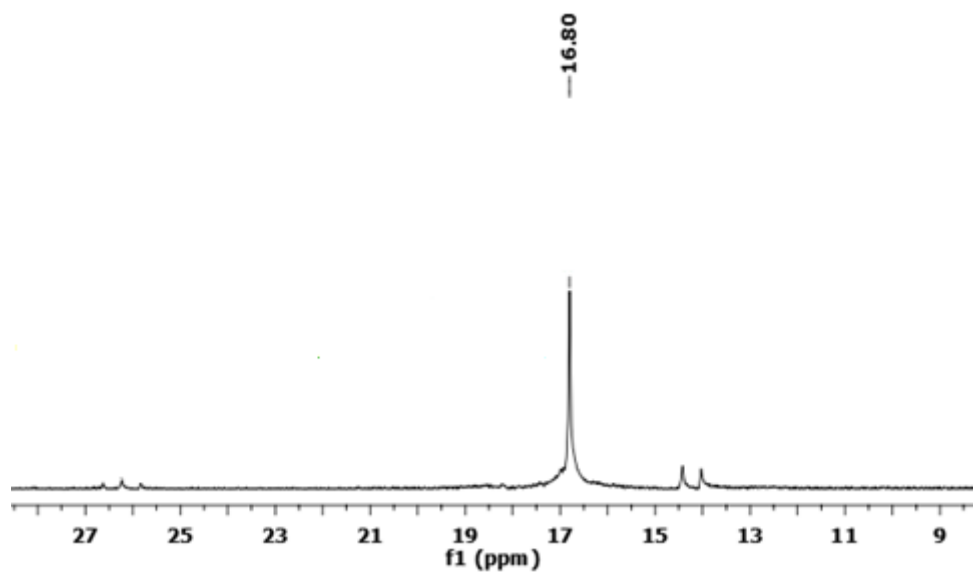

**Figure S15:**  $^{31}\text{P}$ -decoupled NMR spectrum of the reaction mixture of **1** with **II** at 1:8 mole ratio.

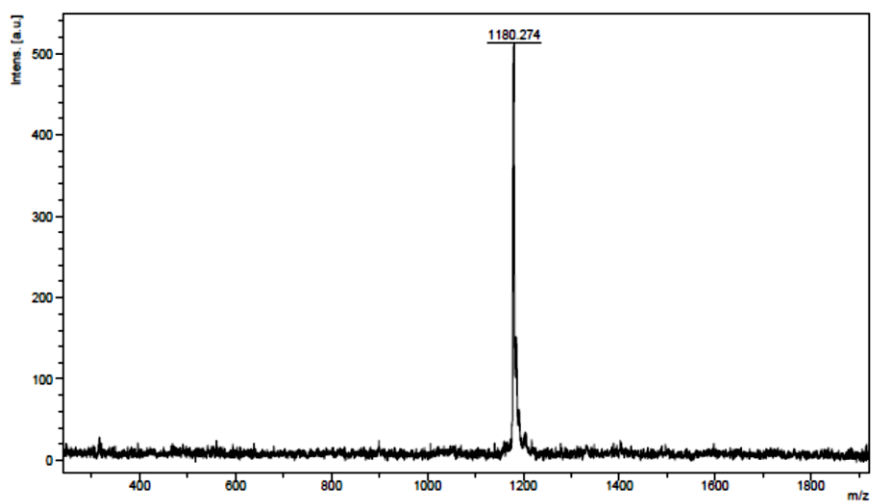

**Figure S16:** The mass spectrum of compound **9**.

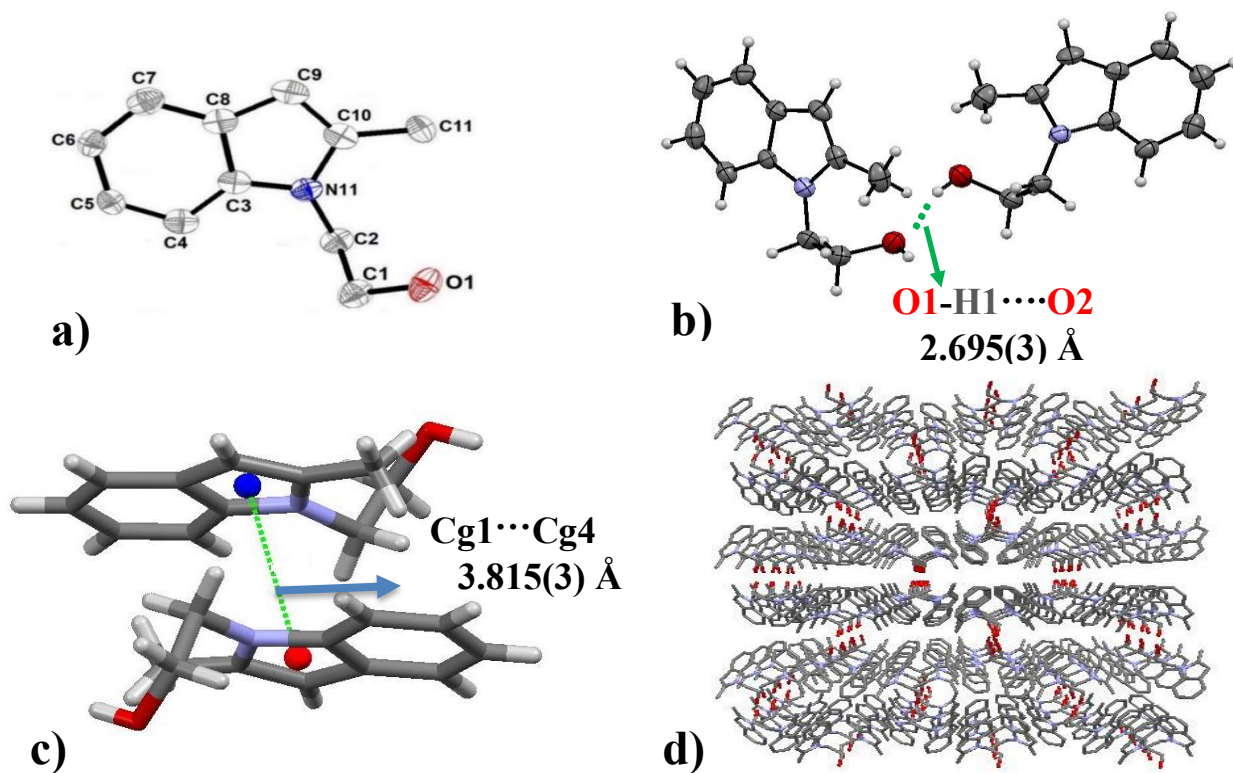

**Figure S17:** a) Crystal structure of **II** with atom numbering scheme, displacement ellipsoids are drawn at the 30% probability level and H atoms are omitted for clarity. b) A view of classical intermolecular O-H/O (green dotted lines along the a-axis) hydrogen bonding. c) Perspective view of intermolecular  $\pi$ - $\pi$  stacking interactions. d) Crystal packing illustration of **II**.

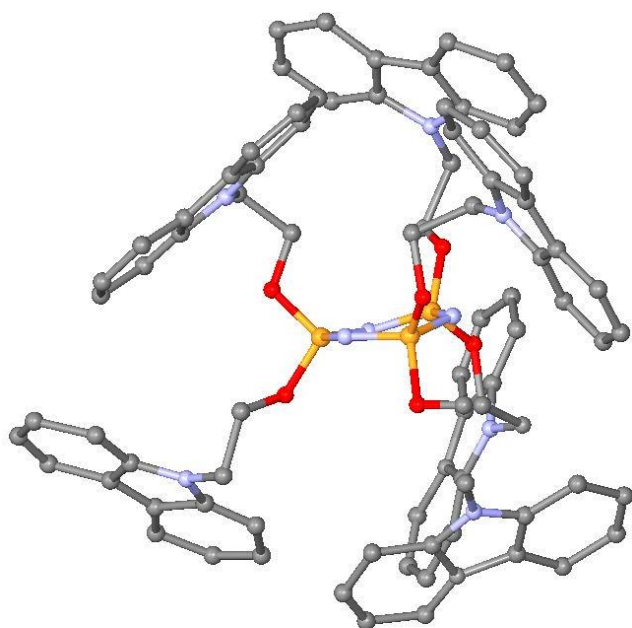

**Figure S18:** Crystal structure of compound **8**. Displacement ellipsoids are drawn at the 30% probability level and H atoms are omitted for clarity. The grey, blue-, red- and orange-coloured atoms represent C, N, O and P atoms, respectively.

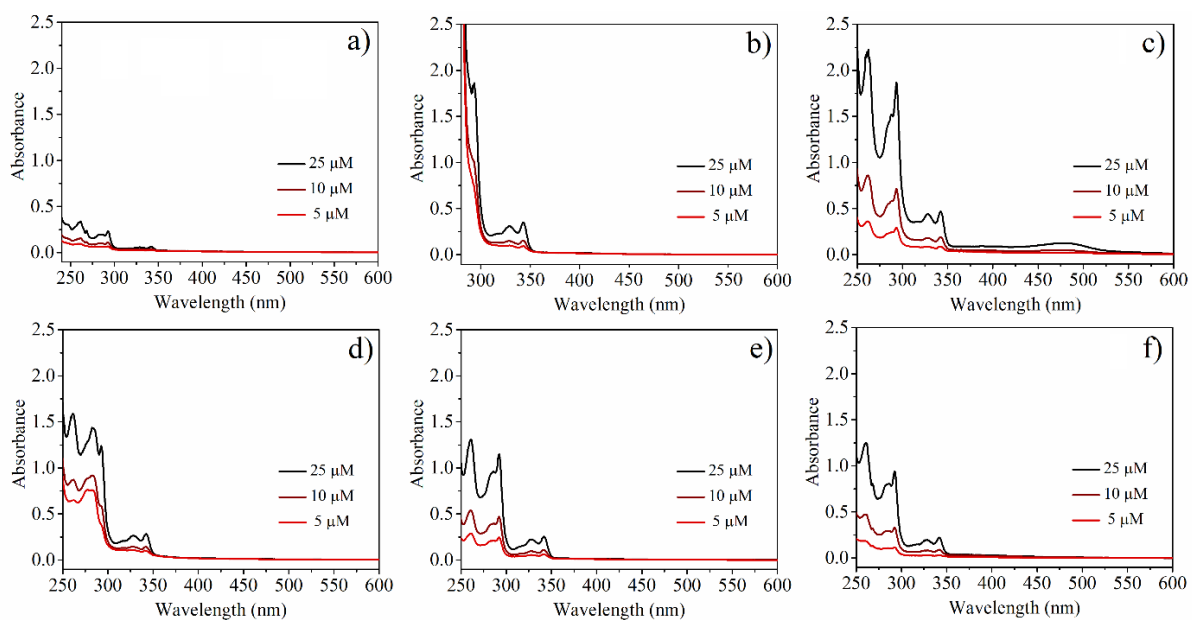

**Figure S19:** UV-Vis absorption spectra for **7a** in various solvents (**a**: n-hexane; **b**: toluene; **c**: dichloromethane; **d**: 1,4-dioxane; **e**: ACN; **f**: EtOH).

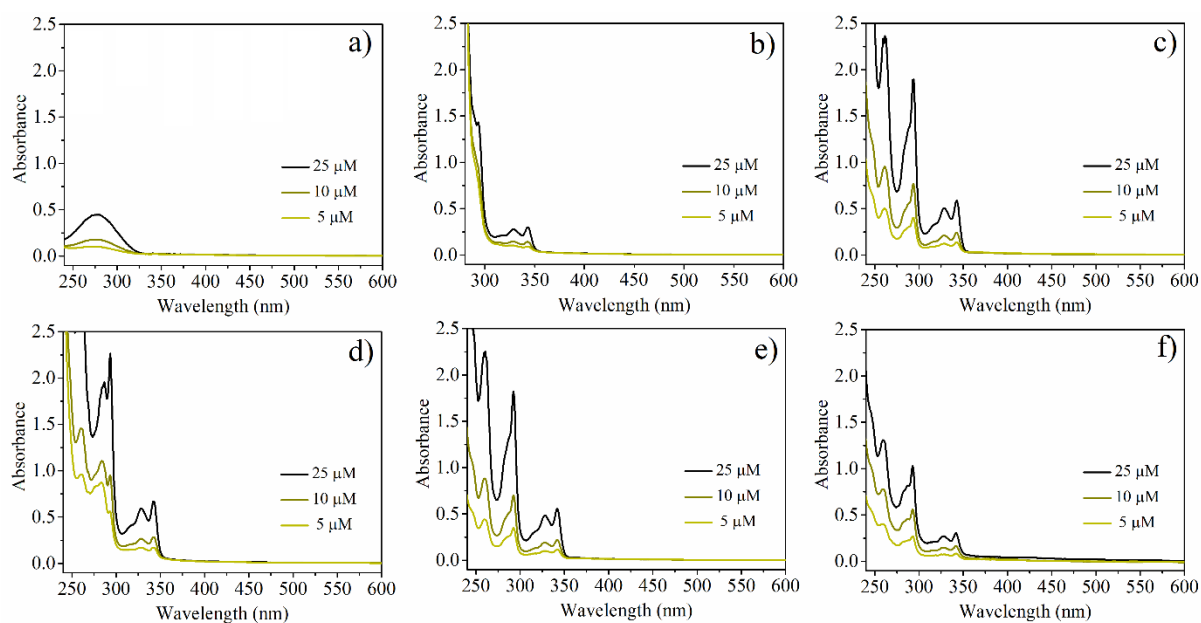

**Figure S20:** UV-Vis absorption spectra for **8** in various solvents (**a**: n-hexane; **b**: toluene; **c**: dichloromethane; **d**: 1,4-dioxane; **e**: ACN; **f**: EtOH).

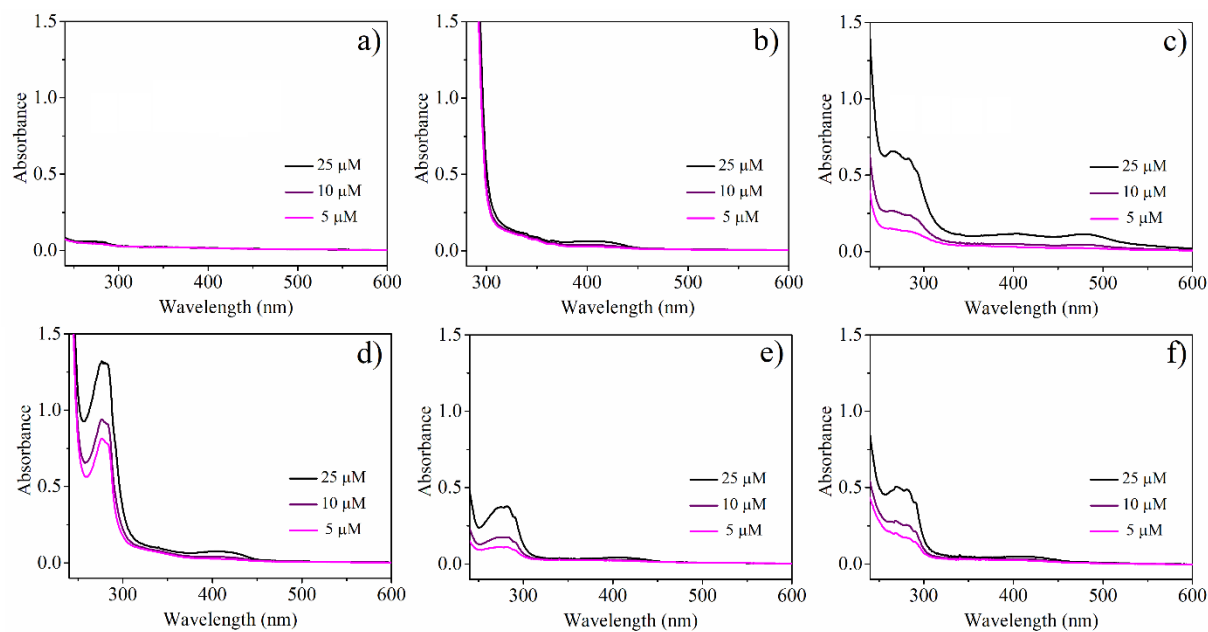

**Figure S21:** UV-Vis absorption spectra for **9** in various solvents (**a**: n-hexane; **b**: toluene; **c**: dichloromethane; **d**: 1,4-dioxane; **e**: ACN; **f**: EtOH).

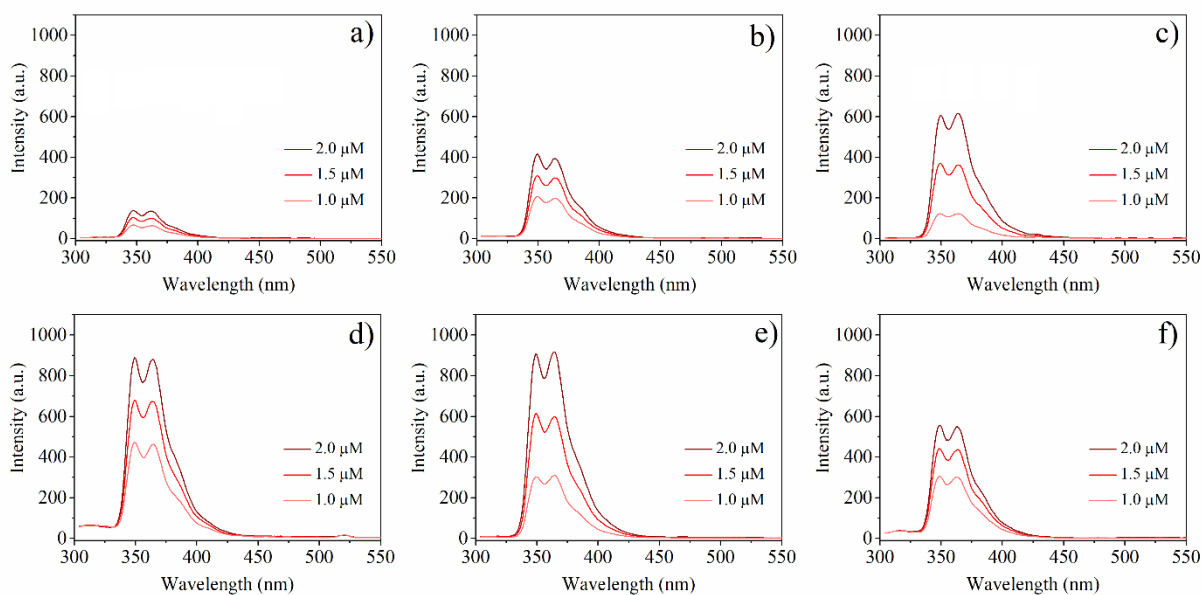

**Figure S22:** Fluorescence spectra for **7a** in various solvents (**a**: n-hexane; **b**: toluene; **c**: dichloromethane; **d**: 1,4-dioxane; **e**: ACN; **f**: EtOH).

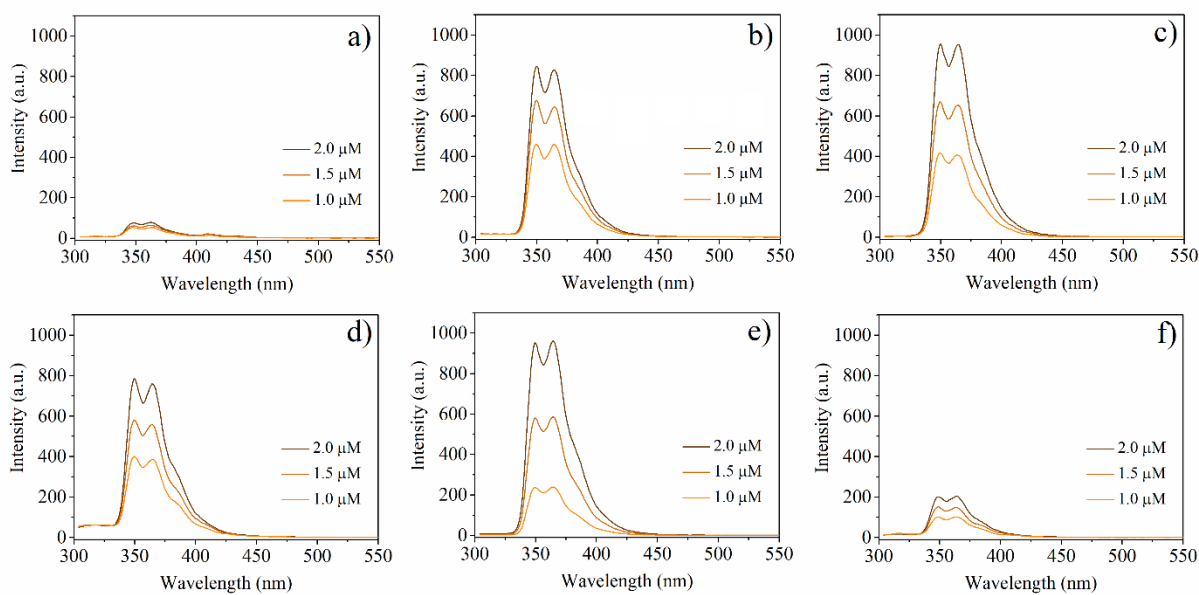

**Figure S23:** Fluorescence spectra for **8** in various solvents (**a**: n-hexane; **b**: toluene; **c**: dichloromethane; **d**: 1,4-dioxane; **e**: ACN; **f**: EtOH).

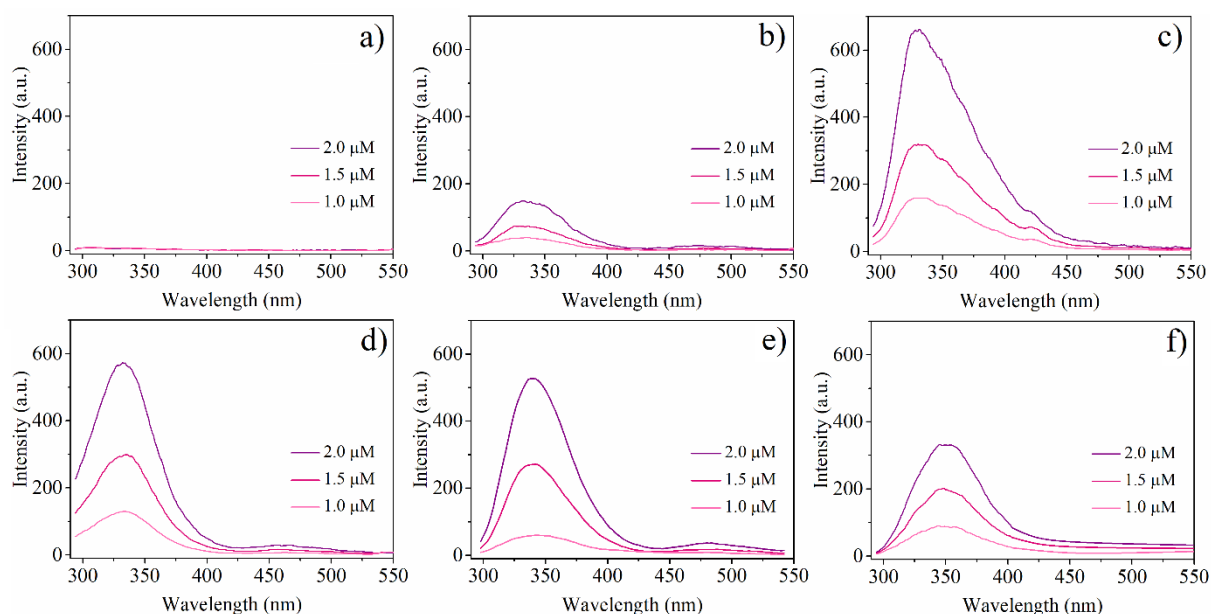

**Figure S24:** Fluorescence spectra for **9** in various solvents (**a**: n-hexane; **b**: toluene; **c**: dichloromethane; **d**: 1,4-dioxane; **e**: ACN; **f**: EtOH).

**Table S1.** Some bond and conformational parameters of compound **3a**.

| Bond length                                                        | <b>3a</b> | Bond / Torsion angles                                      | <b>3a</b>       |
|--------------------------------------------------------------------|-----------|------------------------------------------------------------|-----------------|
| <b>P1-N1</b>                                                       | 1.593(4)  | <b>N1-P1-N3</b>                                            | 117.0(2)        |
| <b>N1-P2</b>                                                       | 1.567(4)  | <b>N1-P2-N2</b>                                            | 118.7(2)        |
| <b>P2-N2</b>                                                       | 1.579(4)  | <b>N2-P3-N3</b>                                            | 117.4(2)        |
| <b>N2-P3</b>                                                       | 1.574(4)  | <b>P1-N1-P2</b>                                            | 118.9(2)        |
| <b>P3-N3</b>                                                       | 1.592(4)  | <b>P2-N2-P3</b>                                            | 122.2(2)        |
| <b>P1-N3</b>                                                       | 1.589(4)  | <b>P1-N3-P3</b>                                            | 118.6(2)        |
| <b>P1-O1</b>                                                       | 1.559(3)  | <b>P1-O1-C1</b>                                            | 118.0(3)        |
| <b>P2-O2</b>                                                       | 1.551(3)  | <b>P2-O2-C15</b>                                           | 123.8(3)        |
| <b>P3-O3</b>                                                       | 1.557(3)  | <b>P3-O3-C29</b>                                           | 119.5(3)        |
| <b>P1-Cl1</b>                                                      | 2.021(2)  | <b>P1-N1-P2-N2</b>                                         | -13.2(4)        |
| <b>P2-Cl2</b>                                                      | 2.024(17) | <b>P2-N2-P3-N3</b>                                         | -2.7(4)         |
| <b>P3-Cl3</b>                                                      | 1.990(18) | <b>P3-N3-P1-N1</b>                                         | -31.8(4)        |
| <b>Puckering amplitude, Q for P<sub>3</sub>N<sub>3</sub> rings</b> | 0.261(3)  | <b>Max. Deviation for P<sub>3</sub>N<sub>3</sub> rings</b> | 0.1826(18) (P1) |

**Table S2.** Selected intermolecular interactions for **II** and **3a**.

| Intermolecular interactions |              |                       |              |                      |                      |
|-----------------------------|--------------|-----------------------|--------------|----------------------|----------------------|
| <b>II</b>                   |              |                       |              |                      |                      |
| <b>I...J</b>                |              | <b>D(I...J)</b>       |              | <b>Symmetry code</b> |                      |
| O1...O2                     |              | 2.682(3)              |              | -1/2+x,1/2-y,z       |                      |
| C6...H4                     |              | 2.82                  |              | 1/2+x,1/2-y,z        |                      |
| H1...H2                     |              | 2.39                  |              | -1/2+x,1/2-y,z       |                      |
| H1...O2                     |              | 1.90                  |              | -1/2+x,1/2-y,z       |                      |
| <b>3a</b>                   |              |                       |              |                      |                      |
| <b>I...J</b>                |              | <b>D(I...J)</b>       |              | <b>Symmetry code</b> |                      |
| C11...H11                   |              | 2.94                  |              | x,-1+y,z             |                      |
| C12...H24                   |              | 2.94                  |              | x,-1+y,z             |                      |
| C12...H35                   |              | 2.88                  |              | x,1/2-y,1/2+z        |                      |
| C7...H1B                    |              | 2.88                  |              | 1-x,1/2+y,3/2-z      |                      |
| C9...H18                    |              | 2.76                  |              | x,1/2-y,-1/2+z       |                      |
| H6...H15A                   |              | 2.35                  |              | 1-x,1/2+y,3/2-z      |                      |
| <b>II</b>                   |              |                       |              |                      |                      |
| <b>I...J</b>                |              | <b>X-H(I)...Cg(J)</b> |              | <b>Symmetry code</b> |                      |
| C1—H1B...Cg1                |              | 3.807(4)              |              | -1/2+x,1/2-y,z       |                      |
| C11—H11C...Cg5              |              | 3.754(5)              |              | 1/2-x,-1/2+y,-1/2+z  |                      |
| C11—H11C...Cg6              |              | 3.730(5)              |              | 1/2-x,-1/2+y,-1/2+z  |                      |
| C13—H13B...Cg5              |              | 3.752(4)              |              | -1/2+x,1/2-y,z       |                      |
| C22—H22C...Cg2              |              | 3.552(4)              |              | 1/2-x,1/2+y,1/2+z    |                      |
| C22—H22C...Cg3              |              | 3.561(4)              |              | 1/2-x,1/2+y,1/2+z    |                      |
| <b>3a</b>                   |              |                       |              |                      |                      |
| <b>X—H(I)...Cg(J)</b>       | <b>H..Cg</b> | <b>H-Perp</b>         | <b>X..Cg</b> | <b>X-H..Cg</b>       | <b>Symmetry code</b> |
| C2—H2A...Cg7                | 2.88         | -2.86                 | 3.664(6)     | 137                  | x,y,z                |
| C18—H18...Cg1               | 2.82         | -2.72                 | 3.506(5)     | 130                  | x,1/2-y,1/2+z        |
| C19—H19...Cg5               | 2.81         | -2.81                 | 3.600(5)     | 141                  | x,1/2-y,1/2+z        |
| C30—H30A...Cg9              | 2.95         | -2.83                 | 3.709(7)     | 135                  | -x,1-y,1-z           |

**Table S3.** Some selected intramolecular interactions for **II** and **3a**.

| <b>Intramolecular interactions</b> |                 |
|------------------------------------|-----------------|
| <b>II</b>                          |                 |
| <b>I...J</b>                       | <b>D(I...J)</b> |
| O1...N1                            | 3.054(4)        |
| N1...C9                            | 2.230(5)        |
| C2...C4                            | 3.074(6)        |
| C3...C9                            | 2.267(5)        |
| C4...C7                            | 2.809(6)        |
| C2...C11                           | 3.056(6)        |
| C1...C3                            | 3.307(5)        |
| C3...C6                            | 2.742(6)        |
| C5...C8                            | 2.777(5)        |
| C8...C10                           | 2.255(5)        |
| <b>3a</b>                          |                 |
| <b>I...J</b>                       | <b>D(I...J)</b> |
| C11...C1                           | 3.278(6)        |
| C12...C15                          | 3.343(5)        |
| P1...N2                            | 3.110(4)        |
| P2...N3                            | 3.149(4)        |
| O1...N4                            | 3.025(5)        |
| O3...N6                            | 2.876(5)        |
| N4...C9                            | 2.260(6)        |
| C14...C8                           | 2.290(9)        |
| C14...C11                          | 2.751(9)        |
| C3...C9                            | 2.280(7)        |
| C4...C7                            | 2.809(7)        |
| C15...N1                           | 3.177(6)        |
| N5...C23                           | 2.273(6)        |
| C37...N6                           | 2.264(6)        |
